# Supplementary material for: DNA Methylation and Normal Chromosome Behavior in Neurospora Depend on Five Components of a Histone Methyltransferase Complex, DCDC
Source: PubMed Central journal article supplement (PMC2973830; doi:10.1371/journal.pgen.1001196), 2010-11-04

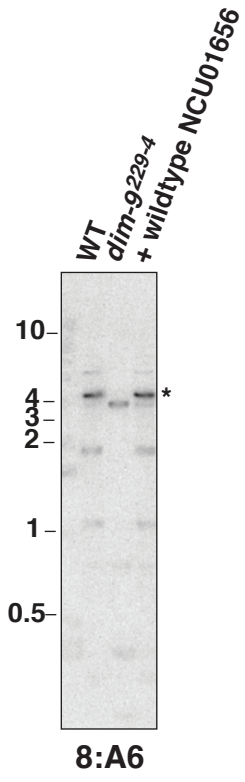

Supplement: pgen.1001196.s002.pdf [file pgen.1001196.s002.pdf]
